# Supplementary material for: Large-Scale Monitoring of Bird Communities along an Altitudinal Gradient in Two Central High Atlas Valleys
Source: Hindawi journal article supplement (doi:10.1155/2024/8873008), 2024-03-14
Supplement: f1 [file 8873008.f1.docx]

**Supplementary files**


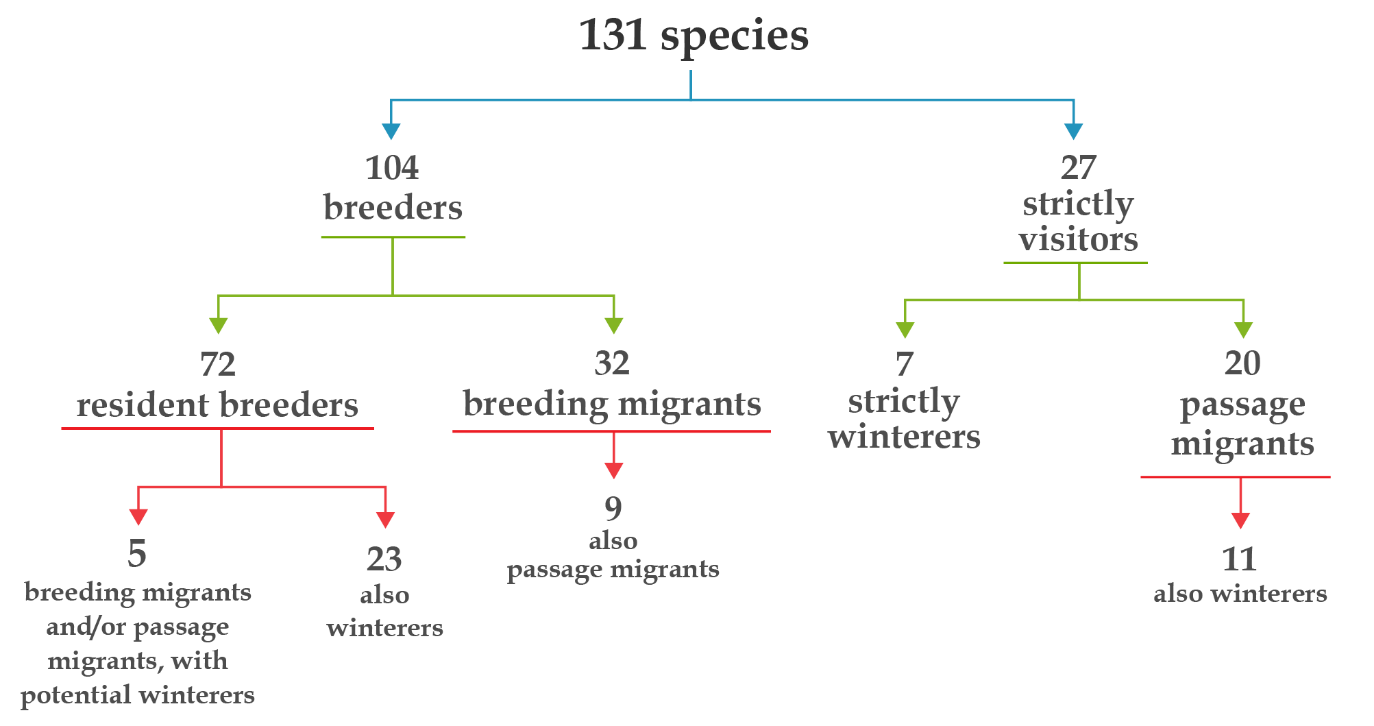


**Figure SM A:** Phenology of bird species recorded in Oued Ahançal and Aït Bouguemmaz valleys.


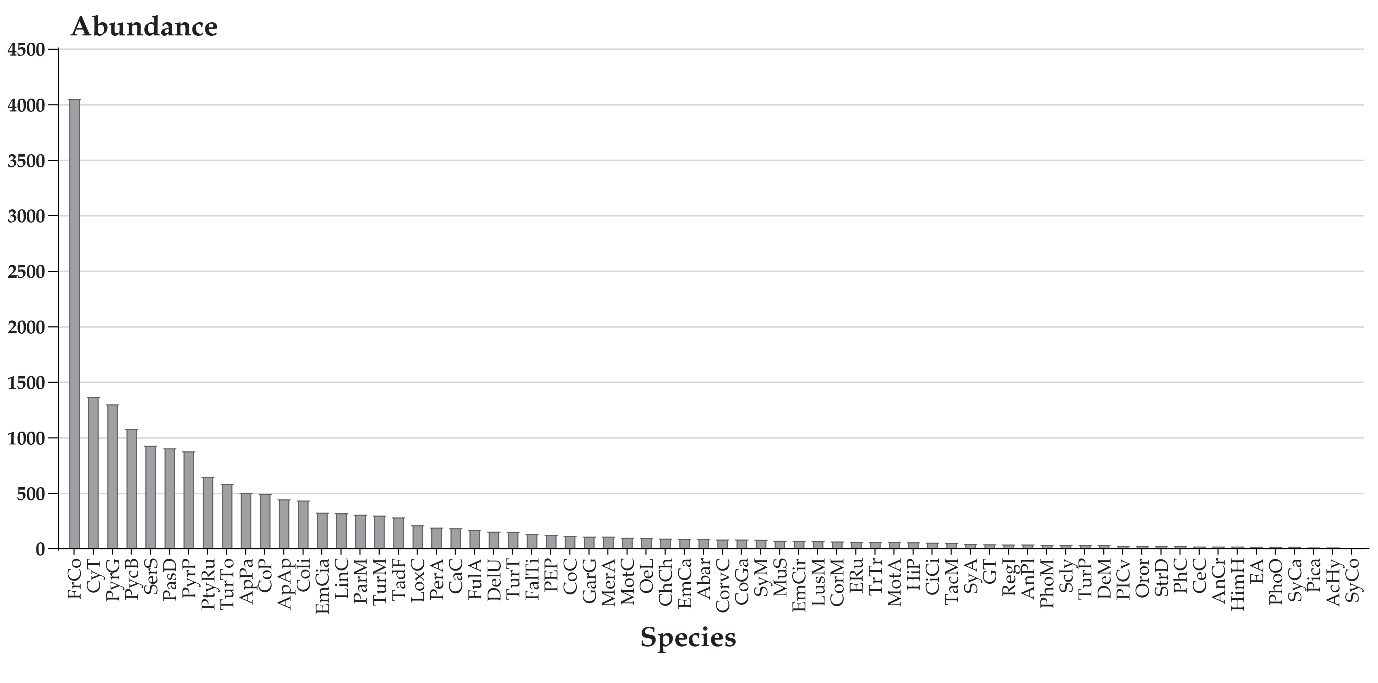


**Figure SM B:** Abundance profile of avian species in Oued Ahançal and Aït Bouguemmaz valleys.


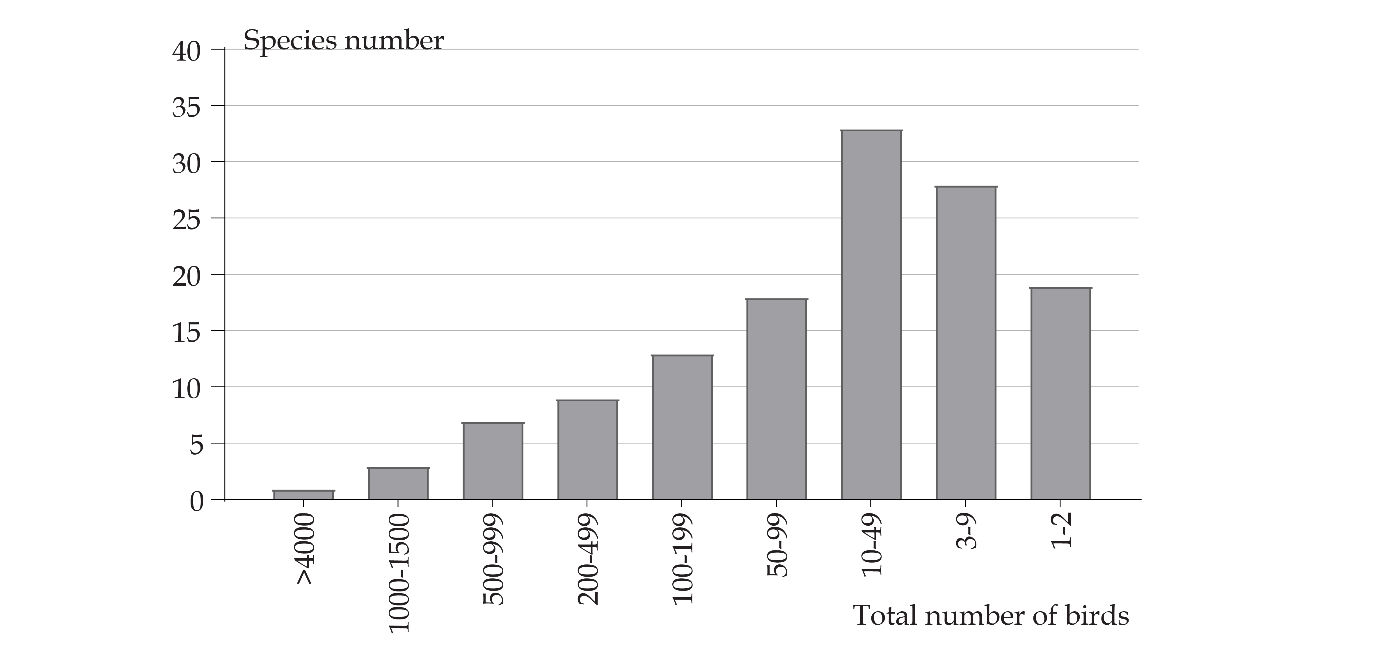


**Figure SM C:** Abundance classes of avian species in the global avifauna assemblage of the Ahançal and Aït Bouguemmaz valleys.
